# Supplementary material
Source: publisher figshare collection journal article supplement (https://acs.figshare.com/ndownloader/files/5784378)
Supplement: Supplementary file 1 [file 5784378]

## SUPPORTING INFORMATION

**Synthesis of  $[1',2',3',4',5',6'-^{13}\text{C}_6]\text{-(2',3',4',6'-Tetraacetyl-}\beta\text{-D-glucopyranosyl)-[6-}^{13}\text{C,1,3,4-}^{15}\text{N}_3\text{]-cytosine}$ .** To the suspension of  $[6-^{13}\text{C,1,3,4-}^{15}\text{N}_3]\text{-N}^4\text{-benzoylcytosine}$  [9] (1.10 g, 5 mmol) and  $[^{13}\text{C}_6]\text{-(glucosepenta-O-acetate}$  [11] (2.07 g, 5.3 mmol) in dichloromethane (20 mL) BSA (2.45 mL, 10 mmol) was added. The mixture was stirred under nitrogen at ambient temperature for 20 min to result a clear, colorless solution. After addition of  $\text{SnCl}_4$  (1.76 mL, 15 mmol) under nitrogen the reaction mixture was heated under reflux for 2 h. The resulted brown mixture was cooled to ambient temperature, after removal of the solvent in vacuo the resulted oil was diluted in ethylacetate (100 mL) and washed with  $\text{NaHCO}_3$  (75 mL). The voluminous precipitate of  $\text{Sn(OH)}_4$  was filtered off and washed with ethylacetate (EE)(5 x 20 mL). The combined organic layers were washed with brine (2 x 50 mL) and dried over  $\text{Na}_2\text{SO}_4$ . After evaporating the solvent the resulted oil was purified by column chromatography (silica, 14 x 3 cm, ethyl acetate / n-hexane = 2 : 1). Yield: 3.6 g (94 %); Rf (ethyl acetate): 0.48; mp: 247-249°C (methanol); 0.34; mp: 153 – 155°C (EtOH);  $^{13}\text{C-NMR}$  (50 MHz,  $\text{CDCl}_3$ ):  $\delta$  = 20.2, 20.3, 20.4, 20.6 (4 x  $\text{CH}_3$  Ac), 61.5 (d,  $J$  = 43 Hz,  $\text{CH6}'$ ), 67.8 (t,  $J$  = 43 Hz,  $\text{CH4}'$ ), 71.9 (t,  $J$  = 43 Hz,  $\text{CH2}'$ ), 73.4 (t,  $J$  = 43 Hz,  $\text{CH3}'$ ), 75.1 (t,  $J$  = 43 Hz,  $\text{CH5}'$ ), 81.0 (d x d,  $J^1$  = 14.6 Hz,  $J^2$  = 45 Hz,  $\text{CH1}'$ ), 94.7 ( $J_{\text{NC}}$  = 267 Hz, 5-C), 127.6 (3,5-CH Bz), 129.1 (2,6-CH Bz), 133.4 (4-CH Bz), 139.4 ( $J_{\text{NC}}$  = 48.5, 1-C Bz), 144.2 ( $J_{\text{NC}}$  = 48.4, 6-C), 155.2 ((t),  $J_{\text{NC}}$  = 11 Hz, 2-C), 164.7 (d,  $J_{\text{NC}}$  = 55 Hz, 4-C), 162.7 (C=O Bz), 169.5, 169.6, 169.8, 170.5 (4 x C=O Ac);  $^{15}\text{N-NMR}$  (50 MHz,  $\text{DMSO-d}_6$ ):  $\delta$  = 100.5 (N4), 140.6 (N1), 235.0 (N3); Exact Mass:  $\text{C}_{25}\text{H}_{28}\text{N}_3\text{O}_{11}$ ; Calc.: 556.1869; Found: 556.1862.

**$[1',2',3',4',5',6'-^{13}\text{C}_6]\text{-(}\beta\text{-D-Glucopyranosyl)-[6-}^{13}\text{C,1,3,4-}^{15}\text{N}_3\text{]-cytosine}$ .** Yield: 2.50 g 92 %; Rf (ethyl acetate) 0.1, mp: 195-196°C ( $\text{CH}_2\text{Cl}_2$ );  $^{13}\text{C-NMR}$  (50 MHz,  $\text{DMSO-d}_6$ ):  $\delta$  = 61.0 (d,  $J$  = 43 Hz,  $\text{CH6}'$ ), 69.9 (t,  $J$  = 43 Hz,  $\text{CH4}'$ ), 71.2 (t,  $J$  = 43 Hz,  $\text{CH2}'$ ), 77.5 (t,  $J$  = 43 Hz,  $\text{CH3}'$ ), 80.0 (t,  $J$  = 43 Hz,  $\text{CH5}'$ ), 82.7 (d x d,  $J^1$  = 14.6 Hz,  $J^2$  = 45 Hz,  $\text{CH1}'$ ), 92.0 ( $J_{\text{NC}}$  = 267 Hz, 5-C), 142.1 ( $J_{\text{NC}}$  = 48.4, 6-C), 155.5 ((t),  $J_{\text{NC}}$  = 11 Hz, 2-C), 165.5 (d,  $J_{\text{NC}}$  = 55 Hz, 4-C);  $^{15}\text{N-NMR}$  (50 MHz,  $\text{DMSO-d}_6$ ):  $\delta$  = 91.8 (N4), 149.3 (N1), 212.5208.1 (N3); Exact Mass:  $\text{C}_3\text{C}_7\text{H}_{30}\text{N}_2\text{O}_8$ ; Calc.: 284.1055; Found: 284.1061.

**Synthesis of  $N^4$ -Benzoyl-[1',2',3',4',5',6'- $^{13}\text{C}_6$ ]-( $\beta$ -D-glucopyranosyl)-[6- $^{13}\text{C}$ ,1,3,4- $^{15}\text{N}_3$ ]-cytosine.**

In an inert atmosphere TMSCl (1.80 g, 2 mL, 16 mmol) was added to a solution of [1',2',3',4',5',6'- $^{13}\text{C}_6$ ]-( $\beta$ -D-glucopyranosyl)-[6- $^{13}\text{C}$ ,1,3,4- $^{15}\text{N}_3$ ]-cytosine (0.85 g, 3.2 mmol) in pyridine (8 mL). The mixture was stirred at ambient temperature for 15 min. After addition of benzoylchloride (0.91 g, 0.76 mL, 6.4 mmol) stirring was continued for another 3 h. The reaction mixture was cooled to 0 °C, ice water (10 mL) was added and after stirring for 15 min conc.  $\text{NH}_3$  (20 mL) was added. The solvent was removed in *vacuo* after stirring for another 30 min at ambient temperature. The resulted oil was diluted with ethylacetate (EE) (100 mL) and washed with water (20 mL). After drying the organic layer over  $\text{Na}_2\text{SO}_4$  the solvent was evaporated and the resulted oil was treated with MeOH /water (1 : 1, 14 mL) and ammonium chloride (2 g). After stirring the mixture at 40 °C for 4 hours, the solvent was evaporated to dryness, the residue was purified by column chromatography (silica, 24 x 3 cm,  $\text{CH}_2\text{Cl}_2/\text{MeOH}$  = 9 : 1). Yield: 1.04 g (90 %); Rf (ethyl acetate) 0.52, mp: 189-191°C ( $\text{CH}_2\text{Cl}_2$ );  $^{13}\text{C}$ -NMR (50 MHz,  $\text{DMSO}-d_6$ ):  $\delta$  = 59.0 (d,  $J$  = 43 Hz,  $\text{CH6}'$ ), 67.9 (t,  $J$  = 43 Hz,  $\text{CH4}'$ ), 69.8 (t,  $J$  = 43 Hz,  $\text{CH2}'$ ), 75.4 (t,  $J$  = 43 Hz,  $\text{CH3}'$ ), 78.6 (t,  $J$  = 43 Hz,  $\text{CH5}'$ ), 82.6 (d x d,  $J^1$  = 14.6 Hz,  $J^2$  = 45 Hz,  $\text{CH1}'$ ), 95.0 (d x d,  $J^1$  = 14.6 Hz,  $J^2$  = 66 Hz, 5-CH), 126.9 (3,5-CH Bz), 127.6 (2,6-CH Bz), 131.2 (4-CH Bz), 132.6 ( $J_{\text{NC}}$  = 48.5, 1-C Bz), 139.6 (d,  $J$  = 14.6 Hz, 6-CH), 147.7 ((t),  $J$  = 11 Hz, 2-C), 166.0 (d,  $J$  = 11 Hz, 4-C); Exact Mass:  $\text{C}_{10}^*\text{C}_7\text{H}_{20}^*\text{N}_3\text{O}_7$ ; Calc.: 388.1447; Found: 388.1490.

**6'-O-Monomethoxytrityl- $N^4$ -benzoyl-[1',2',3',4', 5',6'- $^{13}\text{C}_6$ ]-( $\beta$ -D-glucopyranosyl)-[6- $^{13}\text{C}$ ,1,3,4- $^{15}\text{N}_3$ ]-cytosine.** Yield: 2.27 g (83%); Rf ( $\text{CH}_2\text{Cl}_2/\text{MeOH}$  = 9 : 1) 0.25, mp: 150 -154°C;  $^{13}\text{C}$ -NMR (50 MHz,  $\text{CDCl}_3$ ):  $\delta$  = 54.8 ( $\text{CH}_3\text{O}$ ), 62.6 (d,  $J$  = 43 Hz,  $\text{CH6}'$ ), 69.7 (t,  $J$  = 43 Hz,  $\text{CH4}'$ ), 73.6 (t,  $J$  = 43 Hz,  $\text{CH2}'$ ), 76.3 (t,  $J$  = 43 Hz,  $\text{CH3}'$ ), 77.6 (t,  $J$  = 43 Hz,  $\text{CH5}'$ ), 82.8 (d x d,  $J^1$  = 14.6 Hz,  $J^2$  = 45 Hz,  $\text{CH1}'$ ), 85.6 (C MMT), 97.5 ( $J_{\text{NC}}$  = 267 Hz, 5-C), 112.4 (AA'BB' MMT), 126.9 – 131.5 (C Ar MMT + Bz), 132.4 (4-CH Bz), 134.7 (1C-Bz), 136.3 (1C AA'BB' MMT), 143.7 (2 x 1C MMT), 144.2 ( $J_{\text{NC}}$  = 48.4, 6-C), 155.4 ((t),  $J$  = 11 Hz, 2-C), 157.9 (4C AA'BB'), 163.2 (C=O Bz), 166.6 (d,  $J$  = 11 Hz, 4-C);

<sup>15</sup>N-NMR (50 MHz, DMSO-d<sub>6</sub>): δ = 96.7 (N4), 163.0 (N1), 224.9 (N3); Exact Mass: C<sub>30</sub>\*C<sub>7</sub>H<sub>36</sub>\*N<sub>3</sub>O<sub>8</sub>:

Calc: 660.2648; Found: 660.2626.

**[1',2',3',4',5'-<sup>13</sup>C<sub>5</sub>]-5'-O-Monomethoxytrityl-*N*<sup>4</sup>-[6-<sup>13</sup>C, 1,3,4-<sup>15</sup>N<sub>3</sub>]-benzoylcytidine dialdehyde.**

Yield: 0.57 g (92 %); R<sub>f</sub> (CH<sub>2</sub>Cl<sub>2</sub>/MeOH = 95 : 5) 0.49; MS: (LSIMS; Thgly, NaOAc; m/z (%): 273 (100 %) 662 (3) [M-H+2Na]<sup>+</sup>.

**[1',2',3',4',5'-<sup>13</sup>C<sub>5</sub>]-5'-O-Monomethoxytrityl-*N*<sup>4</sup>-[6-<sup>13</sup>C,1,3,4-<sup>15</sup>N<sub>3</sub>]-benzoylcytidine [17].** Yield: 0.31 g (54 %); R<sub>f</sub> (CH<sub>2</sub>Cl<sub>2</sub>/MeOH = 9 : 1) 0.38, mp: 140 – 146°C (CH<sub>2</sub>Cl<sub>2</sub>); <sup>13</sup>C-NMR (50 MHz, DMSO-d<sub>6</sub>): δ = 55.2 (s, CH<sub>3</sub>O), 62.5 (d, *J* = 43 Hz, CH5'), 68.7 (t, *J* = 43 Hz, CH2'), 74.4 (d x d, *J* ~ 43 Hz, CH3'), 82.0 (d x d, *J* ~ 43 Hz, CH4'), 91.1 (d x d, *J*<sup>1</sup> = 12 Hz, *J*<sup>2</sup> = 45 Hz, CH1'), 85.6 (C MMT), 96.1 (*J*<sub>NC</sub> = 267 Hz, 5-C), 113.0 (AA'BB' MMT), 126.9 – 131.5 (C Ar MMT + Bz), 132.9 (4-CH Bz), 133.4 (1C-Bz), 135.1 (1C AA'BB' MMT), 144.0 (2 x 1C MMT), 144.3 (*J*<sub>NC</sub> = 48.4, 6-C), 154.5 ((t), *J* = 11 Hz, 2-C), 158.0 (4C AA'BB'), 163.2 (C=O Bz), 167.6 (d, *J* = 11 Hz, 4-C); Exact Mass: C<sub>30</sub>\*C<sub>6</sub>H<sub>34</sub>\*N<sub>3</sub>O<sub>7</sub>:  
Calc.: 629.2509; Found: 629.2527.
